# Supplementary material for: Cardiovascular Protective Effect of Metformin and Telmisartan: Reduction of PARP1 Activity via the AMPK-PARP1 Cascade
Source: PubMed Central journal article supplement (PMC4795690; doi:10.1371/journal.pone.0151845), 2016-03-17
Supplement: pone.0151845.s003.pdf [file pone.0151845.s003.pdf]

**A**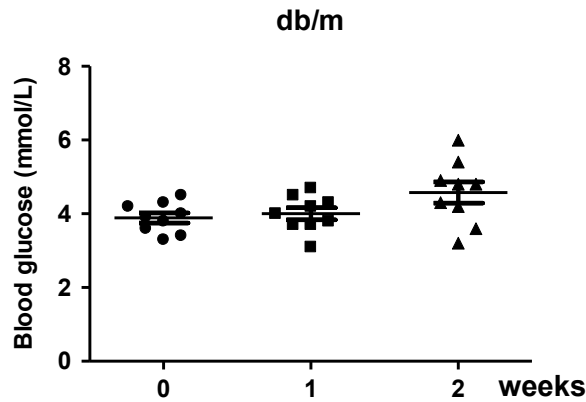**B**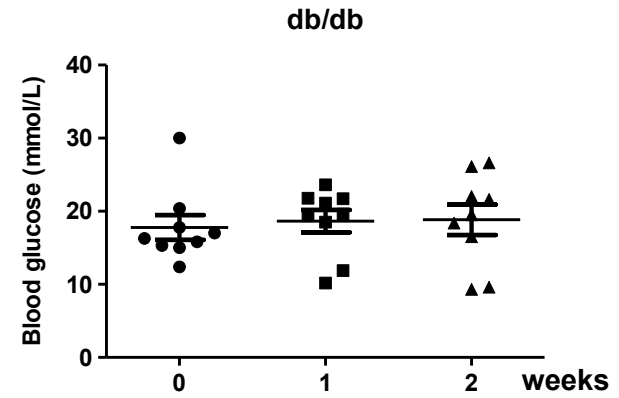**C**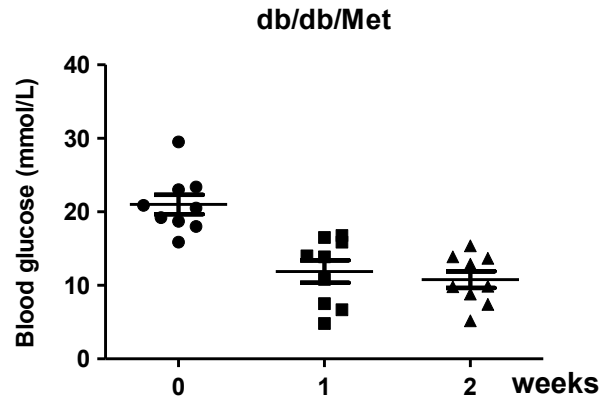**D**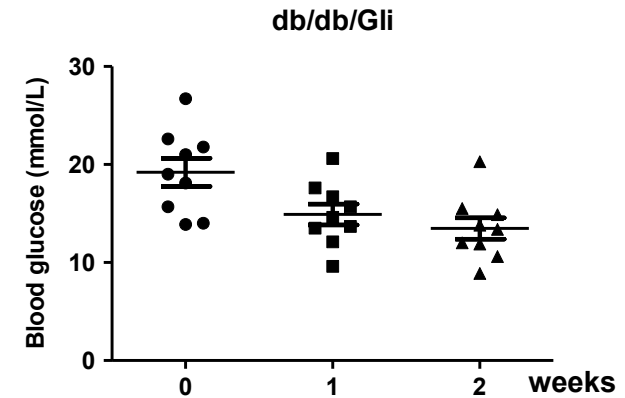

**S3 Fig.** Metformin or glipizide lowered blood glucose in db/db mice. Scatterplots of fasting blood glucose level in various mouse groups. (A) db/m mice and (B,C,D) db/db mice were treated with saline (A,B), metformin (200 mg/kg/day) (C) or glipizide (1.3mg/kg/day) (D) for 2 weeks. Fasting blood glucose level was measured at the beginning of the experiment (0 week), 1, and 2 weeks after drug administration.
