# Supplementary material for: Cardiovascular Protective Effect of Metformin and Telmisartan: Reduction of PARP1 Activity via the AMPK-PARP1 Cascade
Source: PubMed Central journal article supplement (PMC4795690; doi:10.1371/journal.pone.0151845), 2016-03-17
Supplement: pone.0151845.s004.pdf [file pone.0151845.s004.pdf]

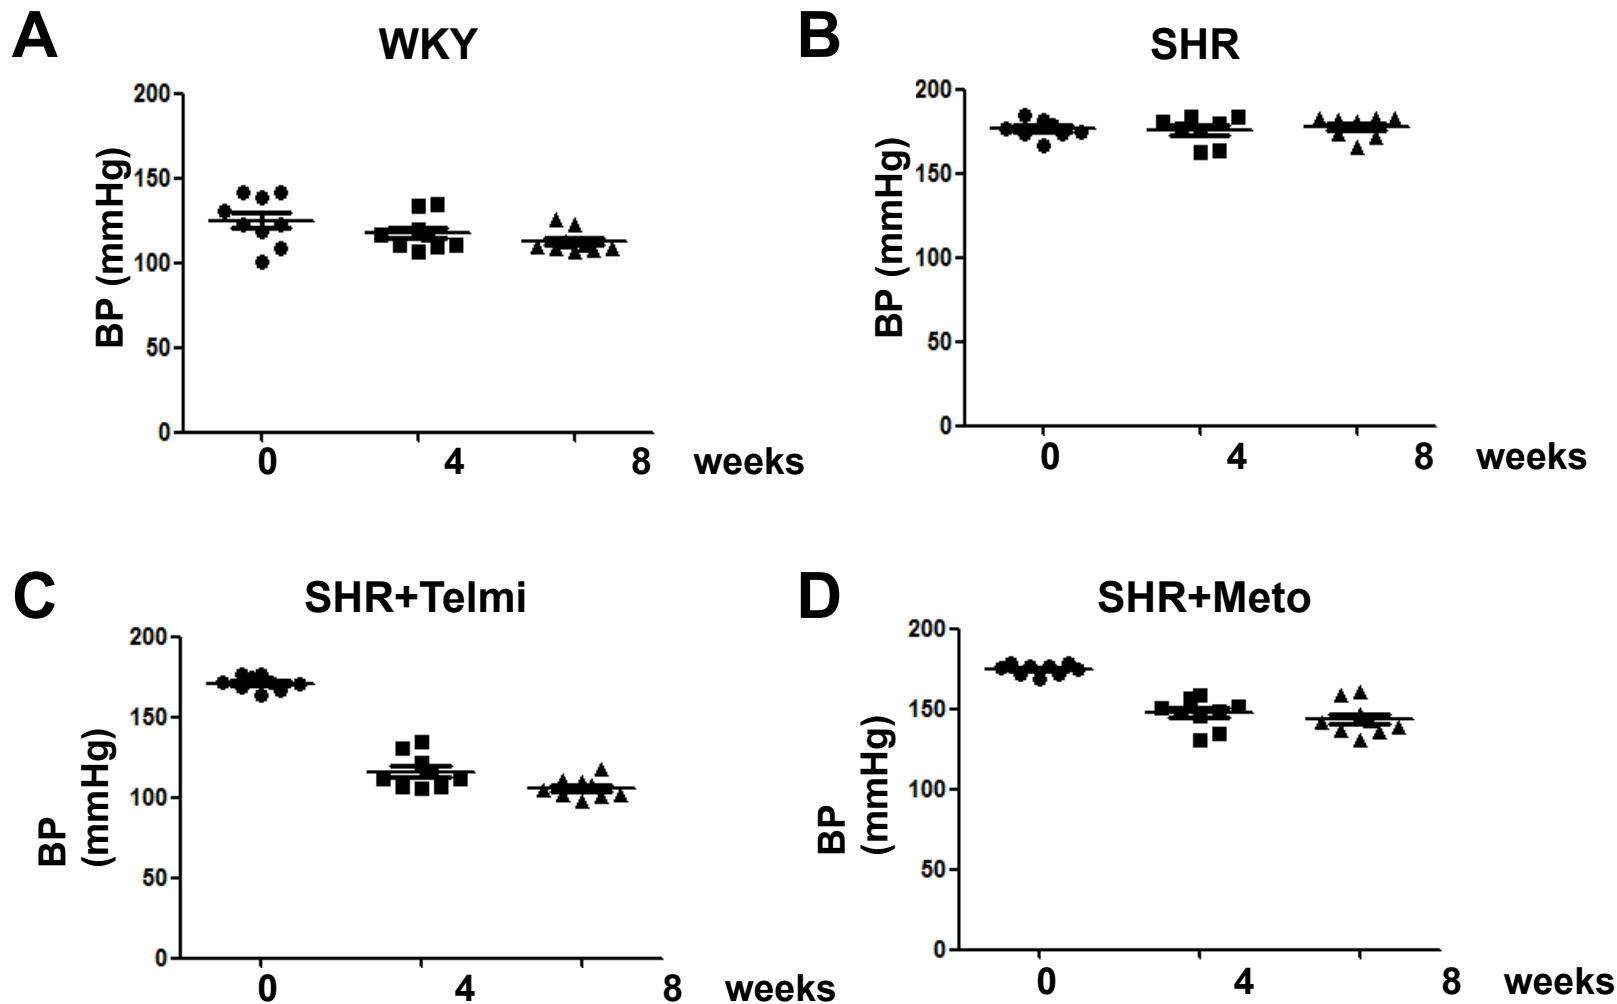

**S4 Fig.** Telmisartan and metoprolol decreased blood pressure in SHR. Scatterplots of blood pressure in WKY and SHR rats. (A) WKY and (B,C,D) SHR rats were treated with saline (A,B), telmisartan (10 mg/kg/day) (C) or metoprolol (30 mg/kg/day) (D) for 8 weeks. Systolic blood pressure level was measured at the beginning of the experiment (0 week), 4, and 8 weeks after drug administration.
