# Supplementary material for: Cardiovascular Protective Effect of Metformin and Telmisartan: Reduction of PARP1 Activity via the AMPK-PARP1 Cascade
Source: PubMed Central journal article supplement (PMC4795690; doi:10.1371/journal.pone.0151845), 2016-03-17
Supplement: pone.0151845.s006.pdf [file pone.0151845.s006.pdf]

**A**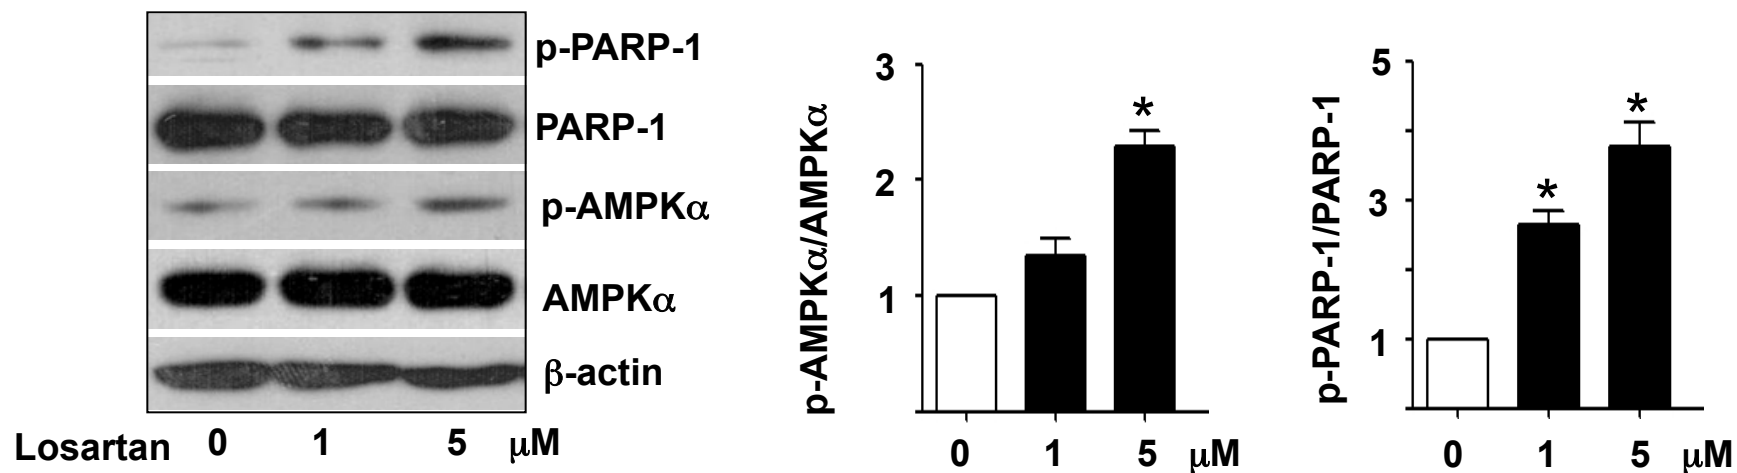**B**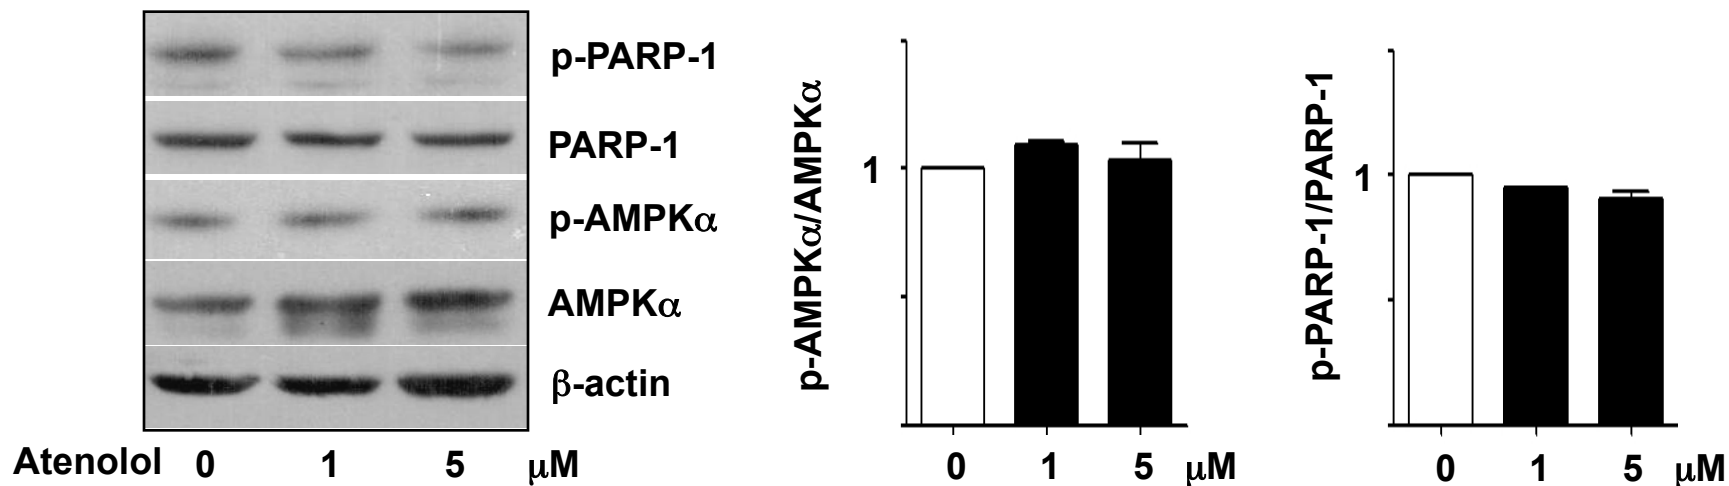

**S6 Fig.** Losartan enhanced AMPK phosphorylation of PARP1 Ser-177 in HUVECs compared to atenolol. Western blot analysis of AMPK Thr-172 and PARP1 Ser-177 phosphorylation in HUVECs treated with losartan (A) or atenolol (B) for 4 hr.
