# Supplementary material for: Cardiovascular Protective Effect of Metformin and Telmisartan: Reduction of PARP1 Activity via the AMPK-PARP1 Cascade
Source: PubMed Central journal article supplement (PMC4795690; doi:10.1371/journal.pone.0151845), 2016-03-17
Supplement: pone.0151845.s007.pdf [file pone.0151845.s007.pdf]

**A**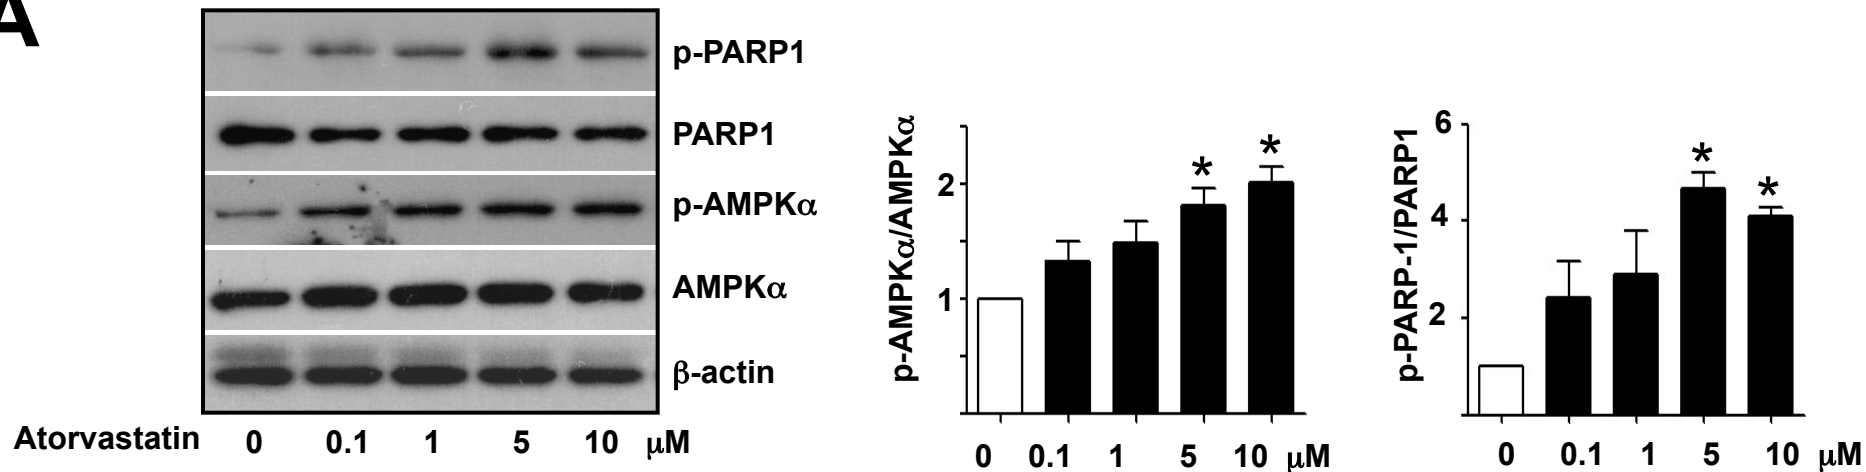**B**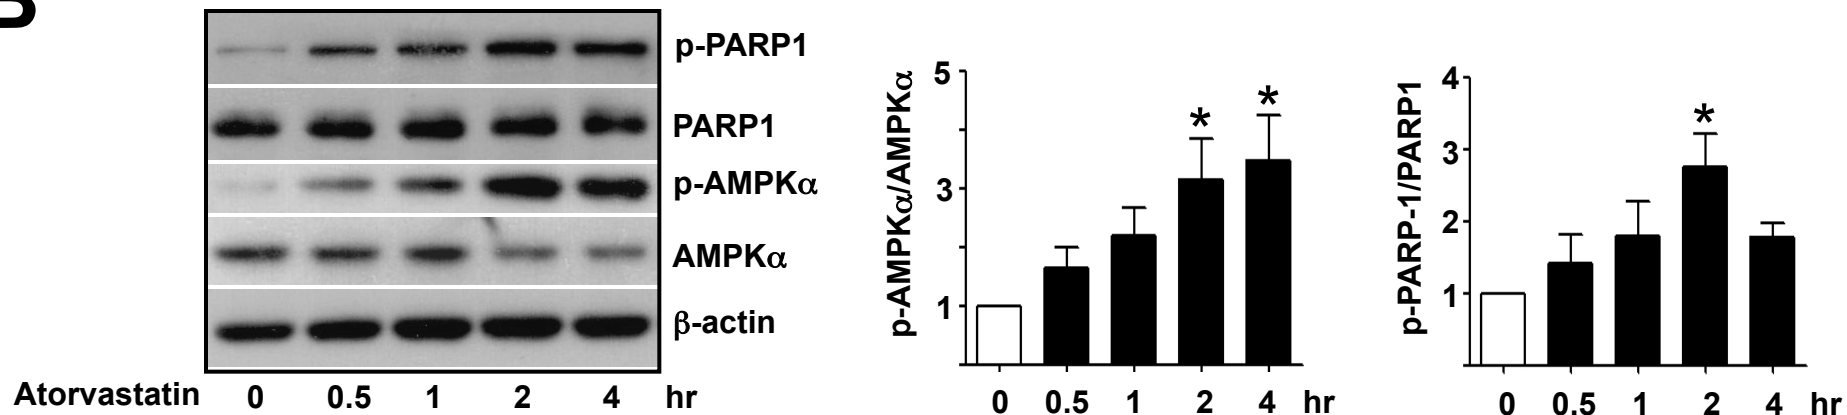

**S7 Fig.** Atorvastatin augmented AMPK phosphorylation of PARP1 Ser-177 in HUVECs. **(A)** HUVECs were treated with atorvastatin with indicated concentrations for 6 hr. **(B)** HUVECs were treated with atorvastatin (5  $\mu\text{M}$ ) for the time indicated. Western blotting was performed with various antibodies.
